# Supplementary material
Source: PubMed Central journal article supplement (PMC4621314)
Supplement: EC.00102-15_zek999094488so1.pdf [file EC.00102-15_zek999094488so1.pdf]

WT + *CPH2p-myc-CPH2*

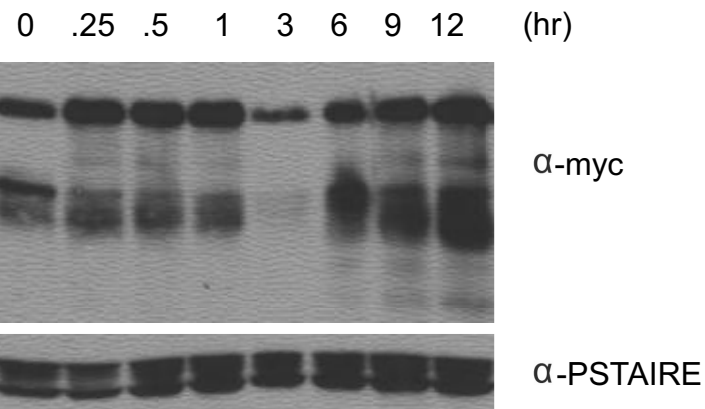

Figure S1. Levels of Cph2N during different phases of growth. WT cells containing *Cph2p-myc-Cph2* (HLY3927) were diluted from an overnight culture to a concentration of  $1 \times 10^7$  cells/ml in YPD at 30°C. Timepoints were taken and cells processed for Western analysis. High levels of the N-terminal Cph2 were present in cells from saturating cultures, where the  $OD_{600}$  was around 10.

WT + *CPH2p-myc-CPH2*

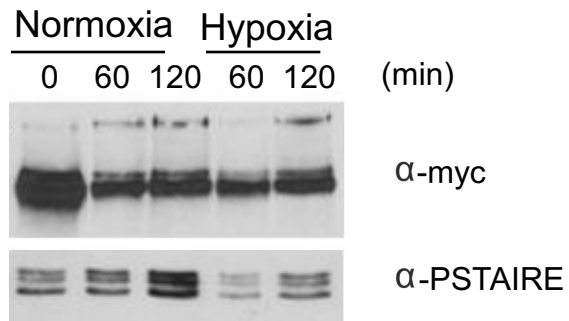

Figure S2. Cph2N level is similar in hypoxia and normoxia

Late log phase cells of Cph2-myc-Cph2 (HLY3927) were washed twice and inoculated 1:50 into prewarmed YPD at 37°C, pretreated in air or hypoxia conditions for 30 minutes. Cells were collected at the times indicated for Western analysis.

Supplemental Table 1. Cph2 bound genes from ChIP-seq

|    | Systematic Name | Gene Name     | Peak Score | Description                                                            | Location   | Peak Start | Peak End |
|----|-----------------|---------------|------------|------------------------------------------------------------------------|------------|------------|----------|
| 1  | orf19.921       | <i>HMS1</i>   | 288.09     | Transcriptional regulator required for morphogenesis                   | UPSTREAM   | 155374     | 155825   |
| 2  | orf19.1048      | <i>IFD6</i>   | 199.46     | Aldo-keto reductase family member                                      | UPSTREAM   | 867078     | 867423   |
| 3  | orf19.6116      | <i>GLK4</i>   | 154.43     | Putative glucokinase                                                   | UPSTREAM   | 162567     | 162594   |
| 4  | orf19.3867      | <i>RPL7</i>   | 66.67      | Ribosomal protein L7; genes encoding cytoplasmic ribosomal subunits    | DOWNSTREAM | 131241     | 131282   |
| 5  | orf19.6390      | <i>UNK</i>    | 38.53      | Ortholog of <i>Candida albicans</i> <i>WO-1</i> : CAWG_02114           | INTRAGENIC | 179141     | 179226   |
| 6  | orf19.734       | <i>GLK1</i>   | 30.74      | Putative glucokinase                                                   | UPSTREAM   | 155874     | 155902   |
| 7  | orf19.727       | <i>UNK</i>    | 29.32      | Predicted ORF in Assemblies 19, 20 and 21                              | UPSTREAM   | 135437     | 135478   |
| 8  | orf19.673       | <i>TCC1</i>   | 25.49      | Protein involved in regulation of filamentous growth and virulence     | UPSTREAM   | 172807     | 172844   |
| 9  | orf19.4476      | <i>UNK</i>    | 22.6       | Predicted ORF in Assemblies 19, 20 and 21                              | UPSTREAM   | 844014     | 844360   |
| 10 | orf19.5191      | <i>FGR6-1</i> | 20.31      | Protein lacking an ortholog in <i>S. cerevisiae</i>                    | UPSTREAM   | 580906     | 581283   |
| 11 | orf19.2023      | <i>HGT7</i>   | 18.46      | Putative glucose transporter                                           | INTRAGENIC | 165886     | 166175   |
| 12 | orf19.4450.1    | <i>UNK</i>    | 18.19      | Protein conserved among the fungal CTG-clade                           | UPSTREAM   | 153578     | 153609   |
| 13 | orf19.1785      | <i>UNK</i>    | 17.84      | Hap43p-repressed gene                                                  | UPSTREAM   | 204129     | 204161   |
| 14 | orf19.7084      | <i>DFI1</i>   | 15.88      | Cell-surface associated glycoprotein                                   | UPSTREAM   | 57453      | 58163    |
| 15 | orf19.3682      | <i>CWH8</i>   | 14.59      | Putative dolichyl pyrophosphate (Dol-P-P) phosphatase                  | UPSTREAM   | 473723     | 473979   |
| 16 | orf19.6874      | <i>UNK</i>    | 12.26      | Putative helix-loop-helix (HLH) transcription factor                   | UPSTREAM   | 114388     | 114408   |
| 17 | orf19.882       | <i>HSP78</i>  | 11.92      | Putative heat-shock protein                                            | UPSTREAM   | 709801     | 710055   |
| 18 | orf19.7054      | <i>UNK</i>    | 11.66      | Ortholog of <i>Candida albicans</i> <i>WO-1</i> : CAWG_05421           | INTRAGENIC | 113811     | 114430   |
| 19 | orf19.3504      | <i>RPL23A</i> | 11.23      | Ribosomal protein                                                      | INTRAGENIC | 425223     | 425448   |
| 20 | orf19.7436      | <i>AAF1</i>   | 10.91      | Possible regulatory protein                                            | UPSTREAM   | 147531     | 147560   |
| 21 | orf19.3549      | <i>CDC21</i>  | 10.89      | Putative thymidylate synthase                                          | UPSTREAM   | 106935     | 106958   |
| 22 | orf19.1353      | <i>UNK</i>    | 10.37      | Biofilm-and planktonic growth-induced gene                             | INTRAGENIC | 167681     | 167760   |
| 23 | orf19.3231      | <i>CDC27</i>  | 8.9        | Putative ubiquitin-protein ligase                                      | UPSTREAM   | 291026     | 291260   |
| 24 | orf19.4961      | <i>STP2</i>   | 8.41       | Amino-acid-regulated transcription factor                              | UPSTREAM   | 291114     | 291140   |
| 25 | orf19.5005      | <i>OSM2</i>   | 8.32       | Putative mitochondrial fumarate reductase                              | UPSTREAM   | 300599     | 300641   |
| 26 | orf19.2943.5    | <i>UNK</i>    | 8.3        |                                                                        | UPSTREAM   | 536492     | 536756   |
| 27 | orf19.4805      | <i>UNK</i>    | 7.96       | Putative membrane protein; Hap43p-induced gene                         | INTRAGENIC | 208010     | 208034   |
| 28 | orf19.2809      | <i>CTN3</i>   | 7.82       | Predicted peroxisomal carnitine acetyl transferase                     | UPSTREAM   | 835695     | 835967   |
| 29 | orf19.5604      | <i>MDR1</i>   | 7.72       | Plasma membrane multidrug efflux pump                                  | UPSTREAM   | 668512     | 668789   |
| 30 | orf19.1659      | <i>ALG8</i>   | 7.32       | Putative glucosyltransferase involved in cell wall mannan biosynthesis | UPSTREAM   | 412075     | 412339   |
| 31 | orf19.88        | <i>ILV5</i>   | 7.07       | Ketol-acid reductoisomerase                                            | UPSTREAM   | 171491     | 171794   |
| 32 | orf19.5762      | <i>PGA61</i>  | 6.76       | Putative GPI-anchored protein                                          | UPSTREAM   | 843223     | 843466   |
| 33 | orf19.33        | <i>UNK</i>    | 6.7        | Predicted ORF from Assembly 19; removed from Assembly 20               | UPSTREAM   | 133313     | 133375   |
| 34 | orf19.2529.1    | <i>UNK</i>    | 6.24       |                                                                        | UPSTREAM   | 338519     | 338932   |
| 35 | orf19.4669      | <i>AAT22</i>  | 6.17       | Protein similar to <i>S. cerevisiae</i> Aat2p                          | UPSTREAM   | 245481     | 245888   |
| 46 | orf19.434       | <i>PRD1</i>   | 5.84       | Putative proteinase                                                    | UPSTREAM   | 111607     | 111629   |
| 37 | orf19.6659      | <i>GAP6</i>   | 5.45       | Broad-specificity amino acid permease                                  | UPSTREAM   | 784941     | 785370   |
| 38 | orf19.251       | <i>UNK</i>    | 5.43       | ThiI/Pfpl protein                                                      | UPSTREAM   | 566093     | 566415   |
| 39 | orf19.5952      | <i>UNK</i>    | 5.2        | Sef1p-, Sfu1p-, and Hap43p-induced protein of unknown function         | UPSTREAM   | 103898     | 103924   |
| 40 | orf19.5079      | <i>CDR4</i>   | 5.08       | Putative transporter of ATP-binding cassette (ABC) superfamily         | UPSTREAM   | 175711     | 175789   |
| 41 | orf19.6869      | <i>UNK</i>    | 4.73       | Ortholog(s) have role in protein targeting to membrane and cytoplasm   | UPSTREAM   | 113217     | 113270   |
| 42 | orf19.542       | <i>HXK2</i>   | 4.58       | Hexokinase II                                                          | UPSTREAM   | 994880     | 995199   |
| 43 | orf19.4679      | <i>AGP2</i>   | 4.55       | Amino acid permease                                                    | UPSTREAM   | 227679     | 228124   |
| 44 | orf19.1313      | <i>CDR3</i>   | 4.48       | Transporter of the Pdrp/Cdrp family of the ATP-binding cassette        | UPSTREAM   | 780135     | 780536   |
| 45 | orf19.3981      | <i>MAL31</i>  | 4.48       | Putative high-affinity maltose transporter                             | UPSTREAM   | 107625     | 107661   |
| 46 | orf19.6738      | <i>VAN1</i>   | 4.38       | Member of Mnn9p family of mannosyltransferases                         | UPSTREAM   | 171275     | 171299   |
| 47 | orf19.5626      | <i>UNK</i>    | 4.32       | Biofilm-induced gene                                                   | UPSTREAM   | 707988     | 708250   |
| 48 | orf19.460       | <i>CEK2</i>   | 4.31       | MAP kinase required for wild-type efficiency of mating                 | UPSTREAM   | 124368     | 124391   |
| 49 | orf19.4702      | <i>UNK</i>    | 4          | Biofilm-induced gene                                                   | UPSTREAM   | 168104     | 168411   |
| 50 | orf19.1826      | <i>MDM34</i>  | 3.93       | Putative transcription factor with zinc finger DNA-binding motif       | UPSTREAM   | 130314     | 130351   |
| 51 | orf19.4081      | <i>UNK</i>    | 3.92       | Ortholog of <i>Candida dubliniensis</i> <i>CD36</i> : CD36_23345       | UPSTREAM   | 188804     | 188834   |
| 52 | orf19.3490      | <i>FGR6-4</i> | 3.73       | Protein lacking an ortholog in <i>S. cerevisiae</i>                    | UPSTREAM   | 214745     | 214782   |
| 53 | orf19.822       | <i>HSP21</i>  | 3.73       | Small heat shock protein involved in stress response and virulence     | INTRAGENIC | 838509     | 838780   |
| 54 | orf19.347       | <i>RSN1</i>   | 3.67       | Hap43p-repressed gene                                                  | UPSTREAM   | 742403     | 742794   |
| 55 | orf19.7077      | <i>UNK</i>    | 3.64       | Putative ferric reductase                                              | INTRAGENIC | 70565      | 70819    |

|    |              |              |      |                                                                     |            |        |        |
|----|--------------|--------------|------|---------------------------------------------------------------------|------------|--------|--------|
| 56 | orf19.6986   | <i>UNK</i>   | 3.57 | Has domain(s) with predicted Rab GTPase activator activity          | UPSTREAM   | 123254 | 123288 |
| 57 | orf19.2468   | <i>UNK</i>   | 3.52 | Ortholog(s) have trans-aconitate 3-methyltransferase activity       | UPSTREAM   | 121374 | 121398 |
| 58 | orf19.903    | <i>GPM1</i>  | 3.32 | Phosphoglycerate mutase                                             | INTRAGENIC | 675941 | 676726 |
| 59 | orf19.2825   | <i>UNK</i>   | 3.26 | Putative cytosolic Fe-S protein assembly protein                    | UPSTREAM   | 611274 | 611696 |
| 60 | orf19.5334   | <i>UNK</i>   | 3.24 | Biofilm- and planktonic growth-induced gene                         | INTRAGENIC | 217980 | 218046 |
| 61 | orf19.3405   | <i>ZCF18</i> | 3.1  | Putative transcription factor with zinc finger DNA-binding motif    | UPSTREAM   | 378654 | 378913 |
| 62 | orf19.1690   | <i>TOS1</i>  | 3.1  | Protein similar to alpha agglutinin anchor subunit                  | UPSTREAM   | 339956 | 340170 |
| 63 | orf19.837    | <i>GNA1</i>  | 3.03 | Glucosamine-6-phosphate acetyltransferase                           | UPSTREAM   | 810256 | 810642 |
| 64 | orf19.2929   | <i>GSC1</i>  | 3.02 | Subunit of beta-1,3-glucan synthase                                 | UPSTREAM   | 513495 | 513762 |
| 65 | orf19.542    | <i>HXK2</i>  | 2.96 | Hexokinase II; antigenic in humans                                  | INTRAGENIC | 995409 | 996312 |
| 66 | orf19.2529.1 | <i>UNK</i>   | 2.94 |                                                                     | UPSTREAM   | 339448 | 339710 |
| 67 | orf19.515    | <i>UNK</i>   | 2.91 | Has domain(s) with predicted nucleic acid binding, zinc ion binding | UPSTREAM   | 955207 | 955498 |
| 68 | orf19.396    | <i>EAF6</i>  | 2.87 | Subunit of the NuA4 histone acetyltransferase complex               | UPSTREAM   | 186571 | 186642 |
| 69 | orf19.7021   | <i>GPH1</i>  | 2.74 | Putative glycogen phosphorylase with a role in glycogen metabolism  | UPSTREAM   | 193154 | 193386 |
| 70 | orf19.4064   | <i>GPI7</i>  | 2.37 | Protein involved in attachment of GPI-linked proteins to cell wall  | UPSTREAM   | 106254 | 106281 |

Supplemental Table 2. Genes regulated by Cph2 in RNA-seq.

|           | Systematic Name    | Gene Name          | Description                                                 | Mean Wild Type | Mean <i>cph2</i> | fold change   | p-value          |
|-----------|--------------------|--------------------|-------------------------------------------------------------|----------------|------------------|---------------|------------------|
| <b>1</b>  | <b>orf19.4450.</b> |                    | <b>Protein conserved among the fungal CTG-clade</b>         | <b>8374.47</b> | <b>204.18</b>    | <b>-41.01</b> | <b>1.69E-006</b> |
| 2         | orf19.822          | <i>HSP21</i>       | Small heat shock protein involved in stress response and    | 3549.29        | 266.543          | -13.31        | 0.00818          |
| 3         | orf19.1187         | <i>CPH2</i>        | Myc-bHLH family transcriptional activator of hyphal growth  | 136.131        | 11.3625          | -11.98        | 5.83E-005        |
| 4         | orf19.5308         |                    | Predicted ORF in Assemblies 19, 20 and 21                   | 24.8238        | 4.65898          | -5.328        | 0.00863          |
| 5         | orf19.823          |                    | Ortholog of <i>C. parapsilosis</i> CDC317 : CPAR2_209270    | 354.824        | 72.1822          | -4.915        | 0.000530         |
| 6         | orf19.6882         | <i>OSM1</i>        | Putative flavoprotein subunit of fumarate reductase         | 258.922        | 54.9780          | -4.709        | 0.000363         |
| 7         | orf19.4035         | <i>PGA4</i>        | GPI-anchored cell surface protein                           | 181.815        | 38.7474          | -4.692        | 0.000271         |
| 8         | orf19.2608         | <i>ADH5</i>        | Putative alcohol dehydrogenase                              | 2944.90        | 628.101          | -4.688        | 0.00417          |
| 9         | orf19.5288         | <i>IFE2</i>        | Putative alcohol dehydrogenase                              | 291.002        | 64.3727          | -4.520        | 0.00236          |
| 10        | orf19.675.1        |                    | Putative adhesin-like protein                               | 62.1758        | 14.1706          | -4.387        | 0.00357          |
| <b>11</b> | <b>orf19.2529.</b> |                    |                                                             | <b>308.161</b> | <b>71.165</b>    | <b>-4.330</b> | <b>0.003700</b>  |
| 12        | orf19.2175         |                    | Putative mitochondrial cell death effector                  | 364.292        | 85.2045          | -4.275        | 0.00883          |
| <b>13</b> | <b>orf19.2023</b>  | <b><i>HGT7</i></b> | <b>Putative glucose transporter</b>                         | <b>38.8441</b> | <b>9.3978</b>    | <b>-4.133</b> | <b>0.000892</b>  |
| 14        | orf19.2344         | <i>ASR1</i>        | Putative heat shock protein                                 | 1226.59        | 299.269          | -4.098        | 0.00247          |
| 15        | orf19.7284         | <i>ASR2</i>        | Gene regulated by cAMP and by osmotic stress                | 1868.84        | 477.657          | -3.912        | 0.00551          |
| 16        | orf19.2241         | <i>PST1</i>        | Putative 1,4-benzoquinone reductase                         | 1444.31        | 392.951          | -3.675        | 0.00285          |
| 17        | orf19.3548.        | <i>WH11</i>        | Cytoplasmic protein expressed specifically in white phase   | 65535.4        | 18317.5          | -3.577        | 3.29E-009        |
| 18        | orf19.4816         |                    | Predicted ORF in Assemblies 19, 20 and 21; induced by       | 68.876         | 19.8661          | -3.467        | 0.00497          |
| 19        | orf19.7283         |                    | Ortholog of <i>C. parapsilosis</i> CDC317 : CPAR2_201190    | 93.6196        | 27.6754          | -3.382        | 0.000558         |
| 20        | orf19.5813         |                    | Putative adhesin-like protein                               | 302.097        | 90.5174          | -3.337        | 0.000630         |
| 21        | orf19.320          |                    | Has domain(s) with predicted nucleotide binding,            | 152.254        | 45.8673          | -3.319        | 0.00527          |
| 22        | orf19.5342.        |                    | Protein of unknown function                                 | 433.591        | 130.669          | -3.318        | 0.005047         |
| 23        | orf19.4044         | <i>MUM2</i>        | Protein similar to <i>S. cerevisiae</i> Mum2p               | 212.756        | 65.1743          | -3.264        | 0.004214         |
| 24        | orf19.3822         | <i>SCS7</i>        | Putative ceramide hydroxylase                               | 82.7424        | 25.4679          | -3.248        | 0.00192          |
| 25        | orf19.2803         | <i>HEM13</i>       | Coproporphyrinogen III oxidase;                             | 137.405        | 43.1068          | -3.187        | 0.00558          |
| 26        | orf19.1395         |                    | Ortholog(s) have inorganic phosphate transmembrane          | 46.507         | 15.0772          | -3.084        | 0.004478         |
| <b>27</b> | <b>orf19.88</b>    | <b><i>ILV5</i></b> | <b>Ketol-acid reductoisomerase</b>                          | <b>150.131</b> | <b>48.779</b>    | <b>-3.077</b> | <b>0.006042</b>  |
| 28        | orf19.5158         |                    | Protein with similarity to a human gene associated with     | 370.254        | 122.215          | -3.029        | 0.00857          |
| <b>29</b> | <b>orf19.921</b>   | <b><i>HMS1</i></b> | <b>Transcriptional regulator required for morphogenesis</b> | <b>20.3001</b> | <b>6.8038</b>    | <b>-2.983</b> | <b>0.000143</b>  |
| 30        | orf19.4943         | <i>PSA2</i>        | Mannose-1-phosphate guanyltransferase                       | 365.304        | 123.754          | -2.951        | 0.00234          |
| 31        | orf19.4631         | <i>ERG251</i>      | C-4 sterol methyl oxidase with a role in ergosterol         | 158.298        | 53.704           | -2.947        | 0.00314          |
| 32        | orf19.3932.        |                    | Has domain(s) with predicted nucleic acid binding,          | 148.006        | 51.689           | -2.863        | 0.00179          |
| 33        | orf19.3651         | <i>PGK1</i>        | Phosphoglycerate kinase, enzyme of glycolysis               | 3478.05        | 1215.47          | -2.861        | 0.00547          |
| 34        | orf19.5437         | <i>RHR2</i>        | Glycerol 3-phosphatase                                      | 148.099        | 54.124           | -2.736        | 0.00122          |
| 35        | orf19.5307         | <i>JEN2</i>        | Dicarboxylic acid transporter                               | 102.965        | 37.660           | -2.734        | 0.000811         |
| 36        | orf19.4043         |                    | Predicted ORF in Assemblies 19, 20 and 21                   | 152.648        | 56.1162          | -2.720        | 0.00106          |
| 37        | orf19.5906         | <i>ADE2</i>        | Phosphoribosylaminoimidazole carboxylase                    | 51.5727        | 18.979           | -2.717        | 0.00193          |
| 38        | orf19.6321         | <i>PGA48</i>       | Putative GPI-anchored; adhesin-like protein                 | 104.393        | 40.0591          | -2.605        | 0.00957          |
| 39        | orf19.3707         | <i>YHB1</i>        | Nitric oxide dioxygenase, acts in nitric oxide              | 275.450        | 105.74           | -2.604        | 0.00305          |
| 40        | orf19.6731         |                    | Predicted ORF in Assemblies 19, 20 and 21                   | 43.6092        | 16.8821          | -2.583        | 0.00247          |
| 41        | orf19.6770         |                    | Ortholog of <i>Candida dubliniensis</i> CD36 : CD36_87190   | 84.7933        | 32.917           | -2.575        | 0.00165          |
| 42        | orf19.11           |                    | Gene transcription regulated by Mig1p and Tup1p             | 24.2975        | 9.43942          | -2.574        | 0.000478         |
| 43        | orf19.1862         |                    | Possible stress protein                                     | 3859.69        | 1502.06          | -2.569        | 0.00881          |
| 44        | orf19.4886         |                    | Putative adhesin-like protein                               | 32.3986        | 12.609           | -2.569        | 0.000223         |
| <b>45</b> | <b>orf19.1048</b>  | <b><i>IFD6</i></b> | <b>Aldo-keto reductase family member</b>                    | <b>41.0022</b> | <b>16.012</b>    | <b>-2.560</b> | <b>0.000769</b>  |
| 46        | orf19.7027         |                    | Ortholog of <i>C. parapsilosis</i> CDC317 : CPAR2_301430    | 89.7418        | 35.095           | -2.557        | 0.00387          |
| 47        | orf19.2583         | <i>PTR2</i>        | Oligopeptide transporter involved in uptake of di-          | 78.6124        | 31.157           | -2.523        | 0.00254          |
| 48        | orf19.4530.1       |                    | Biofilm- and planktonic growth-induced gene                 | 162.565        | 65.1257          | -2.4962       | 0.008624         |
| 49        | orf19.3997         | <i>ADH1</i>        | Alcohol dehydrogenase ihuman/mocomplements S.               | 14698.3        | 5908.91          | -2.4875       | 0.000547         |
| 50        | orf19.6387         | <i>HSP104</i>      | Heat-shock protein                                          | 368.23         | 150.035          | -2.4543       | 0.006258         |
| 51        | orf19.4051         | <i>HTS1</i>        | Putative tRNA-His synthetase                                | 100.889        | 41.1232          | -2.4533       | 0.006179         |
| 52        | orf19.238          | <i>CCP1</i>        | Similar to cytochrome-c peroxidase N terminus               | 1209.8         | 502.189          | -2.409        | 0.007917         |
| 53        | orf19.395          | <i>ENO1</i>        | Enolase, enzyme of glycolysis and gluconeogenesis           | 6041.99        | 2526.71          | -2.3912       | 0.001792         |
| 54        | orf19.3612         | <i>PST2</i>        | Putative NADH:quinone oxidoreductase                        | 174.807        | 73.5279          | -2.3774       | 0.007618         |
| 55        | orf19.2770         |                    | Ortholog of <i>C. parapsilosis</i> CDC317 : CPAR2_500340    | 49.6368        | 21.0461          | -2.3585       | 0.000932         |

|     |              |               |                                                                |                |                |                |           |
|-----|--------------|---------------|----------------------------------------------------------------|----------------|----------------|----------------|-----------|
| 56  | orf19.5079   | <b>CDR4</b>   | <b>Putative transporter of ATP-binding cassette (ABC)</b>      | <b>142.547</b> | <b>60.5898</b> | <b>-2.3527</b> | 0.00179   |
| 57  | orf19.4040   | <i>ILV3</i>   | Putative dihydroxyacid dehydratase                             | 58.6053        | 24.9113        | -2.3526        | 0.002409  |
| 58  | orf19.2691   |               | Planktonic growth-induced gene                                 | 133.542        | 57.467         | -2.3238        | 0.003818  |
| 59  | orf19.1375   | <i>LEU42</i>  | Putative alpha-isopropylmalate synthase                        | 39.5192        | 17.051         | -2.3177        | 0.004711  |
| 60  | orf19.1802   | <i>OFD1</i>   | Putative termination and polyadenylation protein               | 78.7728        | 34.2806        | -2.2979        | 0.007733  |
| 61  | orf19.903    | <i>GPM1</i>   | Phosphoglycerate mutase                                        | 4492.86        | 1978.79        | -2.2705        | 0.007469  |
| 62  | orf19.6688   |               | Decreased transcription is observed upon benomyl               | 392.397        | 173.536        | -2.2612        | 0.007204  |
| 63  | orf19.6640   | <i>TPS1</i>   | Trehalose-6-phosphate synthase                                 | 137.694        | 61.7288        | -2.2306        | 0.002658  |
| 64  | orf19.3515   |               | Putative 3-hydroxyanthranilic acid dioxygenase                 | 275.165        | 125.934        | -2.185         | 0.007145  |
| 65  | orf19.5446   |               | Putative protein of unknown function                           | 308.353        | 144.481        | -2.1342        | 0.006577  |
| 66  | orf19.7053   | <i>GAC1</i>   | Putative regulatory subunit of serine/threonine                | 69.477         | 32.6912        | -2.1252        | 0.006993  |
| 67  | orf19.6472   | <i>CYP1</i>   | Peptidyl-prolyl cis-trans isomerase                            | 5727.28        | 2699.15        | -2.1219        | 0.006625  |
| 68  | orf19.7080   | <i>LEU2</i>   | Isopropyl malate dehydrogenase                                 | 130.496        | 62.9254        | -2.0738        | 0.005276  |
| 69  | orf19.4476   |               | <b>Predicted ORF in Assemblies 19, 20 and 21</b>               | <b>58.5462</b> | <b>28.5623</b> | <b>-2.0498</b> | 0.008523  |
| 70  | orf19.3139   |               | Hap43p-repressed gene                                          | 34.3907        | 17.1416        | -2.0063        | 0.009489  |
| 71  | orf19.1290   | <i>XKS1</i>   | Putative xylulokinase                                          | 62.5369        | 31.7229        | -1.9714        | 0.005875  |
| 72  | orf19.1034   |               | Hap43p-repressed gene                                          | 110.042        | 56.6731        | -1.9417        | 0.007308  |
| 73  | orf19.4032   | <i>RPN5</i>   | Putative COP9 signalosome component                            | 60.7539        | 31.2904        | -1.9416        | 0.008987  |
| 74  | orf19.6814   | <i>TDH3</i>   | NAD-linked glyceraldehyde-3-phosphate dehydrogenase            | 13536          | 7057.48        | -1.918         | 8.49E-005 |
| 75  | orf19.4056   | <i>BRG1</i>   | DNA-binding transcription factor involved in control of        | 148.637        | 77.5231        | -1.9173        | 0.008672  |
| 76  | orf19.3150   | <i>GRE2</i>   | Putative reductase; Nrg1p- and Tup1p-regulated                 | 61.1909        | 32.1308        | -1.9044        | 0.004936  |
| 77  | orf19.3104   | <i>YDC1</i>   | Protein with Mob2p-dependent hyphal regulation                 | 21.6807        | 11.4035        | -1.9012        | 0.009673  |
| 78  | orf19.3859   |               | Putative microsomal beta-keto-reductase                        | 131.331        | 69.6242        | -1.8863        | 0.009104  |
| 79  | orf19.6602   |               | Ortholog(s) have role in aerobic respiration                   | 93.122         | 49.8379        | -1.8685        | 0.009203  |
| 80  | orf19.801    | <i>TBF1</i>   | Essential transcriptional activator that regulates ribosomal   | 28.1394        | 15.1279        | -1.8601        | 0.002751  |
| 81  | orf19.5205   |               | Hap43p-repressed gene                                          | 28.0279        | 15.1716        | -1.8474        | 0.001643  |
| 82  | orf19.4953   |               | Ortholog(s) have ATPase activity, role in ER-associated        | 77.9322        | 42.5306        | -1.8324        | 0.007376  |
| 83  | orf19.2219   | <i>ORF298</i> | Predicted ORF in retrotransposon Tca3 with similarity to       | 38.2106        | 20.948         | -1.8241        | 0.003566  |
| 84  | orf19.904    |               | Ortholog(s) have cytosol, nucleus localization                 | 46.7435        | 25.8557        | -1.8079        | 0.005568  |
| 85  | orf19.5206   |               | Ortholog(s) have unfolded protein binding activity             | 23.1821        | 12.8312        | -1.8067        | 0.001713  |
| 86  | orf19.4029   |               | Ortholog(s) have role in ribosomal large subunit assembly      | 140.732        | 80.2452        | -1.7538        | 0.009456  |
| 87  | orf19.4046   |               | Putative transcription factor containing a Zn(2)-Cys(6)        | 50.7143        | 29.1152        | -1.7418        | 0.006605  |
| 88  | orf19.4045   | <i>EST1</i>   | Telomerase subunit; allosteric activator of catalytic activity | 50.7908        | 29.687         | -1.7109        | 0.006727  |
| 89  | orf19.260    | <i>SLD1</i>   | Sphingolipid delta-8 desaturase                                | 41.8382        | 24.4719        | -1.7096        | 0.005366  |
| 90  | orf19.1979   | <i>GIT3</i>   | Putative glycerophosphoinositol permease                       | 46.6121        | 27.3           | -1.7074        | 0.004603  |
| 91  | orf19.6891   | <i>RFC1</i>   | Protein similar to S. cerevisiae Rfc1p                         | 47.2491        | 27.8008        | -1.6996        | 0.009178  |
| 92  | orf19.5210   |               | Hap43p-repressed gene                                          | 28.6134        | 16.9757        | -1.6856        | 0.004617  |
| 93  | orf19.4871   | <i>ERO1</i>   | Protein similar to S. cerevisiae Ero1p                         | 27.7984        | 16.8659        | -1.6482        | 0.008914  |
| 94  | orf19.5801   | <i>RNR21</i>  | Ribonucleoside-diphosphate reductase                           | 44.3686        | 26.9703        | -1.6451        | 0.008728  |
| 95  | orf19.5855   | <i>MBP1</i>   | Putative component of the MBF transcription complex            | 23.6166        | 14.5325        | -1.6251        | 0.007366  |
| 96  | orf19.6800   | <i>POS5</i>   | Protein similar to S. cerevisiae Pos5p                         | 34.2607        | 21.6371        | -1.5834        | 0.009456  |
| 97  | orf19.7668   | <i>MAL2</i>   | Alpha-glucosidase that hydrolyzes sucrose                      | 31.0262        | 20.4803        | -1.5149        | 0.009374  |
| 98  | orf19.3940.1 | <i>CUP1</i>   | Metallothionein, involved in copper resistance                 | 33223.2        | 24760.9        | -1.3418        | 2.31E-005 |
| 99  | orf19.2107.1 | <i>STF2</i>   | Protein involved in ATP biosynthesis                           | 26462.8        | 22096.5        | -1.1976        | 0.009328  |
| 100 | orf19.918    | <i>CDR11</i>  | Putative transporter of PDR subfamily of ABC family            | 26.9966        | 43.6533        | 1.61699        | 0.005554  |
| 101 | orf19.1617   |               | Protein similar to S. cerevisiae Ydr282cp                      | 28.6718        | 46.3732        | 1.61738        | 0.008994  |
| 102 | orf19.6923   |               | Ortholog(s) have chromatin binding activity                    | 26.7027        | 44.1878        | 1.6548         | 0.004538  |
| 103 | orf19.6781   | <i>ZFU2</i>   | Transcriptional regulator of yeast form adherence              | 23.4062        | 38.7594        | 1.65594        | 0.008013  |
| 104 | orf19.2974   | <i>YKT6</i>   | Putative protein of the vacuolar SNARE complex                 | 46.456         | 77.3722        | 1.6655         | 0.00726   |
| 105 | orf19.4988   |               | Predicted ORF in Assemblies 19, 20 and 21                      | 30.09          | 50.3279        | 1.67258        | 0.004992  |
| 106 | orf19.3167   |               | Ortholog(s) have role in heme a biosynthetic process           | 52.9198        | 90.0801        | 1.7022         | 0.007225  |
| 107 | orf19.100    |               | Hap43p-repressed gene; late-stage biofilm-induced              | 23.4129        | 39.9023        | 1.70429        | 0.004302  |
| 108 | orf19.1653   |               | Has domain(s) with predicted integral to membrane              | 100.848        | 172.332        | 1.70883        | 0.006688  |
| 109 | orf19.5215   | <i>TES15</i>  | Putative acyl-CoA thioesterase; Hap43p-repressed gene          | 29.5171        | 51.1599        | 1.73323        | 0.005433  |
| 110 | orf19.2154   | <i>HXK1</i>   | N-acetylglucosamine (GlcNAc) kinase                            | 63.0099        | 109.472        | 1.73737        | 0.006152  |
| 111 | orf19.5617   |               | Ortholog(s) have methylated histone residue binding            | 73.6881        | 128.678        | 1.74625        | 0.008064  |
| 112 | orf19.2215   | <i>GLE1</i>   | Putative nucleoporin; moderately induced at 42 degrees C       | 71.2031        | 124.366        | 1.74664        | 0.006556  |
| 113 | orf19.339    | <i>NDE1</i>   | Putative NADH dehydrogenase                                    | 44.0523        | 77.0306        | 1.74861        | 0.005229  |
| 114 | orf19.4811   |               | Putative tricarboxylate carrier family protein                 | 30.9706        | 54.2066        | 1.75026        | 0.006333  |

|     |              |                    |                                                                      |                |                |                |          |
|-----|--------------|--------------------|----------------------------------------------------------------------|----------------|----------------|----------------|----------|
| 115 | orf19.5142   | <i>DFR1</i>        | Trimethoprim resistant dihydrofolate reductase (DHFR)                | 32.1555        | 56.7851        | 1.76595        | 0.006531 |
| 116 | orf19.5143   |                    | Predicted component of the mitochondrial TIM22                       | 66.3276        | 117.423        | 1.77035        | 0.008756 |
| 117 | orf19.685.1  |                    | Ortholog of <i>C. parapsilosis</i> CDC317 : CPAR2_602135             | 33.6957        | 59.9614        | 1.7795         | 0.004762 |
| 118 | orf19.4028   |                    | Ortholog(s) have dehydrololichyl diphosphate synthase                | 42.2892        | 75.2758        | 1.78002        | 0.009542 |
| 119 | orf19.1738.1 |                    | Ortholog(s) have beta-tubulin binding activity                       | 95.9463        | 171.188        | 1.78421        | 0.005627 |
| 120 | orf19.871    |                    | Ortholog(s) have protein transporter activity                        | 27.8127        | 50.3503        | 1.81033        | 0.002447 |
| 121 | orf19.2671   |                    | Predicted ORF in Assemblies 19, 20 and 21                            | 24.9487        | 45.1834        | 1.81105        | 0.004783 |
| 122 | orf19.1133   | <i>MSB1</i>        | Putative regulator of transcription                                  | 43.94          | 79.5839        | 1.8112         | 0.00536  |
| 123 | orf19.3829   | <i>PHR1</i>        | Glycosidase of cell surface                                          | 67.8759        | 123.138        | 1.81417        | 0.009854 |
| 124 | orf19.1547   |                    | Ortholog(s) have polynucleotide 3'-phosphatase activity              | 28.1037        | 51.1821        | 1.82118        | 0.007989 |
| 125 | orf19.2463   | <i>PRN2</i>        | Protein similar to pirin; Hap43p-repressed gene                      | 21.7233        | 39.6704        | 1.82617        | 0.004701 |
| 126 | orf19.3963   |                    | Ortholog(s) have mitochondrion localization                          | 27.9693        | 51.433         | 1.83891        | 0.003318 |
| 127 | orf19.2956   | <i>MGM101</i>      | Putative mitochondrial genome maintenance protein                    | 83.3428        | 154.657        | 1.85567        | 0.003496 |
| 128 | orf19.685    | <i>YHM1</i>        | Putative mitochondrial carrier protein                               | 100.956        | 187.36         | 1.85585        | 0.004521 |
| 129 | orf19.7125   |                    |                                                                      | 59.3591        | 110.476        | 1.86115        | 0.005036 |
| 130 | orf19.5755   |                    | Ortholog(s) have cyclin-dependent protein kinase regulator           | 37.5667        | 70.2229        | 1.86929        | 0.007902 |
| 131 | orf19.3516   |                    | Hap43p-repressed gene                                                | 22.9719        | 42.9538        | 1.86984        | 0.000956 |
| 132 | orf19.4894   |                    | Protein with similarity to <i>S. cerevisiae</i> Yer010cp             | 50.8737        | 95.4026        | 1.87528        | 0.004591 |
| 133 | orf19.5026   |                    | Putative transcription factor with zinc finger DNA-binding           | 46.4331        | 88.2526        | 1.90064        | 0.003006 |
| 134 | orf19.3213   |                    | Ortholog of <i>S. cerevisiae</i> : JIP4, <i>C. glabrata</i> CBS138 : | 28.6406        | 54.5311        | 1.90398        | 0.00522  |
| 135 | orf19.372    |                    | Putative protein of unknown function; Hap43p-repressed gene          | 52.62          | 101.883        | 1.93619        | 0.008403 |
| 136 | orf19.4983   |                    | Ortholog of <i>C. parapsilosis</i> CDC317: CPAR2_201720              | 20.7581        | 40.1979        | 1.93649        | 0.001586 |
| 137 | orf19.4956   | <i>RPN1</i>        | Putative 19S regulatory particle of the 26S proteasome               | 93.5421        | 182.594        | 1.95199        | 0.002894 |
| 138 | orf19.2809   | <b><i>CTN3</i></b> | <b>Predicted peroxisomal carnitine acetyl transferase</b>            | <b>88.2843</b> | <b>172.648</b> | <b>1.95559</b> | 0.003617 |
| 139 | orf19.5650   | <i>PRO3</i>        | Delta 1-pyrroline-5-carboxylate reductase                            | 97.3529        | 191.489        | 1.96696        | 0.006174 |
| 140 | orf19.4506   | <i>LYS22</i>       | Putative homocitrate synthase                                        | 40.9754        | 81.2707        | 1.9834         | 0.001509 |
| 141 | orf19.73     |                    | Ortholog(s) have role in ribosome biogenesis and                     | 20.2609        | 40.2208        | 1.98514        | 0.000905 |
| 142 | orf19.9      |                    | Ortholog of <i>C. parapsilosis</i> CDC317 : CPAR2_204280             | 24.2302        | 48.5458        | 2.00352        | 0.002819 |
| 143 | orf19.1866   | <i>VMA10</i>       | Ortholog(s) have cytosol, nucleus, vacuolar proton-                  | 6632.9         | 13527.8        | 2.0395         | 0.004442 |
| 144 | orf19.1089   | <i>PEX11</i>       | Putative peroxisomal membrane protein                                | 156.423        | 322.507        | 2.06176        | 0.005958 |
| 145 | orf19.234    | <i>PHA2</i>        | Putative prephenate dehydratase                                      | 34.0887        | 72.1067        | 2.11527        | 0.002727 |
| 146 | orf19.5474   |                    | Predicted ORF in Assemblies 19, 20 and 21                            | 102.377        | 216.643        | 2.11613        | 0.006495 |
| 147 | orf19.6112   | <i>CTA2</i>        | Putative transcriptional activator                                   | 180.067        | 396.758        | 2.20339        | 0.002294 |
| 148 | orf19.376    |                    | Hap43p-repressed gene                                                | 59.8166        | 134.124        | 2.24226        | 0.005097 |
| 149 | orf19.6916   |                    | Ortholog(s) have unfolded protein binding activity                   | 20.822         | 47.2336        | 2.26845        | 0.000946 |
| 150 | orf19.7306   |                    | Aldo-keto reductase family protein                                   | 40.3784        | 91.9867        | 2.27811        | 0.001375 |
| 151 | orf19.4012   | <i>PCL5</i>        | Protein similar to <i>S. cerevisiae</i> Pcl5p and other cyclins for  | 35.7162        | 82.1279        | 2.29946        | 0.001162 |
| 152 | orf19.6724   | <i>FUM12</i>       | Putative fumarate hydratase, enzyme of citric acid cycle             | 140.139        | 323.46         | 2.30815        | 0.000752 |
| 153 | orf19.1797   |                    | Predicted ORF in Assemblies 19, 20 and 21                            | 30.0966        | 69.8721        | 2.3216         | 0.001892 |
| 154 | orf19.6163   | <i>CSE4</i>        | Centromeric histone H3 variant                                       | 21.9305        | 51.1511        | 2.33242        | 0.002388 |
| 155 | orf19.5589   |                    | Predicted ORF in Assemblies 19, 20 and 21                            | 90.1086        | 215.168        | 2.38788        | 0.002831 |
| 156 | orf19.7098   |                    | Putative protein of unknown function                                 | 35.3206        | 84.8364        | 2.40189        | 0.001512 |
| 157 | orf19.2125   |                    | GlcNAc-induced protein                                               | 149.214        | 358.639        | 2.40351        | 0.009773 |
| 158 | orf19.1064   | <i>ACS2</i>        | Acetyl-CoA synthetase                                                | 99.9497        | 240.231        | 2.40352        | 0.001332 |
| 159 | orf19.588    |                    | Ortholog(s) have role in aerobic respiration                         | 25.6727        | 62.6333        | 2.43969        | 0.000661 |
| 160 | orf19.1301   |                    | Ortholog(s) have cytoplasm, nucleus, ribosome localization           | 55.345         | 135.63         | 2.45062        | 0.00078  |
| 161 | orf19.2269   |                    | Putative 3-phosphoserine phosphatase                                 | 45.811         | 112.429        | 2.45418        | 0.000611 |
| 162 | orf19.4324   |                    | Has domain(s) with predicted NADH dehydrogenase                      | 35.3669        | 87.6095        | 2.47716        | 0.00022  |
| 163 | orf19.6509   |                    | Ortholog(s) have role in cellular response to zinc ion and           | 118.189        | 293.297        | 2.48159        | 0.003075 |
| 164 | orf19.6972   | <i>SMI1B</i>       | Putative cell wall assembly regulatory protein                       | 55.0073        | 139.784        | 2.54119        | 0.004613 |
| 165 | orf19.7127.1 |                    | Putative protein of unknown function                                 | 44.6319        | 113.582        | 2.54486        | 0.00182  |
| 166 | orf19.2752   | <i>ADR1</i>        | Putative transcription factor with zinc finger DNA-binding           | 20.5526        | 55.2982        | 2.69057        | 0.00034  |
| 167 | orf19.6114   |                    | Predicted ORF in Assemblies 19, 20 and 21                            | 278.3          | 760.001        | 2.73087        | 0.001427 |
| 168 | orf19.5975   | <i>TRY4</i>        | Putative zinc finger DNA-binding transcription factor                | 225.715        | 616.699        | 2.73221        | 0.002659 |
| 169 | orf19.4600   |                    | Ortholog(s) have mitochondrion localization                          | 42.8462        | 125.291        | 2.92419        | 0.000152 |
| 170 | orf19.5806   | <i>ALD5</i>        | NAD-aldehyde dehydrogenase                                           | 1707.65        | 5080.87        | 2.97536        | 0.001791 |
| 171 | orf19.5741   | <i>ALS1</i>        | Adhesin; ALS family of cell-surface glycoproteins                    | 169.607        | 524.629        | 3.0932         | 0.001508 |
| 172 | orf19.3441   | <i>FRP6</i>        | Putative ammonia transport protein                                   | 143.482        | 447.26         | 3.11719        | 0.001477 |
| 173 | orf19.499    |                    | Ortholog(s) have S-adenosylmethionine-dependent                      | 26.8841        | 84.1157        | 3.12883        | 0.000131 |

|     |              |             |                                                          |         |         |         |          |
|-----|--------------|-------------|----------------------------------------------------------|---------|---------|---------|----------|
| 174 | orf19.183    | <i>HIS3</i> | Imidazoleglycerol-phosphate dehydratase                  | 24.6584 | 82.0688 | 3.32823 | 0.000363 |
| 175 | orf19.6169   | <i>ATO1</i> | Putative fungal-specific transmembrane protein           | 61.9306 | 213.287 | 3.44397 | 0.002506 |
| 176 | orf19.4551   | <i>CTN1</i> | Predicted carnitine acetyl transferase                   | 23.9638 | 83.3609 | 3.47862 | 0.000158 |
| 177 | orf19.1258   |             | Putative adhesin-like protein                            | 21.9508 | 78.6629 | 3.58359 | 0.000215 |
| 178 | orf19.7112   | <i>FRP2</i> | Putative ferric reductase                                | 32.4452 | 133.272 | 4.10759 | 0.000125 |
| 179 | orf19.1743   | <i>ACS1</i> | Putative acetyl-CoA synthetase                           | 161.543 | 681.531 | 4.21889 | 0.000871 |
| 180 | orf19.4773   | <i>AOX2</i> | Alternative oxidase                                      | 164.72  | 730.437 | 4.43443 | 0.000774 |
| 181 | orf19.4921.1 |             | Ortholog of <i>C. parapsilosis</i> CDC317 : CPAR2_801610 | 752.891 | 3392.78 | 4.50634 | 0.000623 |
| 182 | orf19.3934   | <i>CAR1</i> | Arginase involved in arginine catabolism                 | 266.082 | 1368.33 | 5.14249 | 0.000997 |
| 183 | orf19.4393   | <i>CIT1</i> | Citrate synthase                                         | 251.299 | 1302.52 | 5.18316 | 0.000233 |

\* The bolded genes are overlapping with the ChIP-Seq Genes.



Supplemental Table 3. qPCR verification of genes differentially regulated in *cph2* versus wild type in RNA-seq

|    | <b>Systematic</b> | <b>Gene</b>   | <b>Mean Wild</b> | <b>Mean</b>        | <b>fold</b>   | <b>p-value</b> | <b>qPCR value</b> |
|----|-------------------|---------------|------------------|--------------------|---------------|----------------|-------------------|
|    | <b>c</b>          | <b>Name</b>   | <b>Type</b>      | <b><i>cph2</i></b> | <b>change</b> |                |                   |
| 1  | orf19.4450.       |               | 8374.5           | 204.2              | -41.0         | 1.7E-006       | -18               |
| 2  | orf19.822         | <i>HSP21</i>  | 3549.3           | 266.5              | -13.3         | 0.0082         | -7.9              |
| 3  | orf19.6882        | <i>OSM1</i>   | 258.9            | 55.0               | -4.7          | 0.00036        | -2.6              |
| 4  | orf19.2803        | <i>HEM13</i>  | 137.4            | 43.1               | -3.2          | 0.0056         | -3.1              |
| 5  | orf19.921         | <i>HMS1</i>   | 20.3             | 6.8                | -3.0          | 0.00014        | -5.7              |
| 6  | orf19.4631        | <i>ERG251</i> | 158.3            | 53.7               | -2.9          | 0.0031         | -7.6              |
| 7  | orf19.2583        | <i>PTR2</i>   | 78.6             | 31.2               | -2.5          | 0.0025         | -2.5              |
| 8  | orf19.5079        | <i>CDR4</i>   | 142.5            | 60.6               | -2.4          | 0.0018         | -13.7             |
| 9  | orf19.4056        | <i>BRG1</i>   | 148.6            | 77.5               | -1.9          | 0.0087         | -6.5              |
| 10 | orf19.3940.       | <i>CUP1</i>   | 33223.2          | 24760.9            | -1.3          | 2.3E-005       | -1.4              |
| 11 | orf19.7112        | <i>FRP2</i>   | 32.4             | 133.3              | 4.1           | 0.000125       | 3.8               |
| 12 | orf19.4393        | <i>CIT1</i>   | 251.3            | 1302.5             | 5.2           | 0.00023        | 6.0               |

Supplemental Table 4. Gene ontology terms for Cph2-regulated genes from RNA-seq

| Gene Ontology term                             | Cluster frequency          | Background frequency                     | Corrected P-value | False discovery rate | Genes annotated to the term                                                                                                                                                                                                                                                                                                                                                                                                                                                                                                                                          |
|------------------------------------------------|----------------------------|------------------------------------------|-------------------|----------------------|----------------------------------------------------------------------------------------------------------------------------------------------------------------------------------------------------------------------------------------------------------------------------------------------------------------------------------------------------------------------------------------------------------------------------------------------------------------------------------------------------------------------------------------------------------------------|
| oxidation-reduction process                    | 35 out of 183 genes, 19.1% | 418 out of 6517 background genes, 6.4%   | 1.79e-06          | 0.00%                | ACS1, ADH1, ADH5, ALD5, AOX2, CCP1, CIT1, CTN1, DFR1, ERG251, ERO1, FRP2, FUM12, GAC1, HEM13, IFE2, ILV5, LEU2, NDE1, OFD1, OSM1, PEX11, PRO3, RNR21, SCS7, TDH3, YHB1, orf19.2175, orf19.2671, orf19.3139, orf19.3515, orf19.5158, orf19.588, orf19.6602, orf19.7098                                                                                                                                                                                                                                                                                                |
| glycolytic process                             | 6 out of 183 genes, 3.3%   | 16 out of 6517 background genes, 0.2%    | 0.00168           | 0.00%                | ADH1, ENO1, GPM1, HXK1, PGK1, TDH3                                                                                                                                                                                                                                                                                                                                                                                                                                                                                                                                   |
| single-organism metabolic process              | 74 out of 183 genes, 40.4% | 1656 out of 6517 background genes, 25.4% | 0.00261           | 0.00%                | ACS1, ACS2, ADE2, ADH1, ADH5, ALD5, AOX2, CAR1, CCP1, CIT1, CTN1, CTN3, CYP1, DFR1, ENO1, ERG251, ERO1, EST1, FRP2, FUM12, GAC1, GPM1, HEM13, HIS3, HSP104, HSP21, HTS1, HXK1, IFE2, ILV3, ILV5, LEU2, LEU42, LYS22, MAL2, MGM101, MUM2, NDE1, OFD1, OSM1, PEX11, PGA4, PGK1, PHA2, POS5, PRO3, RFC1, RHR2, RNR21, SCS7, SLD1, STF2, TBF1, TDH3, TPS1, XKS1, YDC1, YHB1, orf19.100, orf19.1547, orf19.2175, orf19.2671, orf19.3139, orf19.3167, orf19.3515, orf19.372, orf19.3859, orf19.4028, orf19.4988, orf19.5158, orf19.588, orf19.6602, orf19.7098, orf19.7306 |
| generation of precursor metabolites and energy | 15 out of 183 genes, 8.2%  | 135 out of 6517 background genes, 2.1%   | 0.00284           | 0.00%                | ACS1, ADH1, AOX2, CIT1, CTN1, ENO1, FUM12, GAC1, GPM1, HXK1, NDE1, PGK1, TDH3, orf19.588, orf19.6602                                                                                                                                                                                                                                                                                                                                                                                                                                                                 |
| single-organism biosynthetic process           | 36 out of 183 genes, 19.7% | 628 out of 6517 background genes, 9.6%   | 0.01252           | 0.00%                | ACS1, ACS2, ADE2, ALD5, DFR1, ENO1, ERG251, EST1, GPM1, HEM13, HIS3, HTS1, ILV3, ILV5, LEU2, LEU42, LYS22, MUM2, PGA4, PGK1, PHA2, POS5, PRO3, RHR2, RNR21, SCS7, SLD1, STF2, TPS1, YDC1, orf19.3167, orf19.3515, orf19.3859, orf19.4028, orf19.6602, orf19.7306                                                                                                                                                                                                                                                                                                     |
| cofactor metabolic process                     | 14 out of 183 genes, 7.7%  | 135 out of 6517 background genes, 2.1%   | 0.01324           | 0.00%                | ACS1, ACS2, CIT1, CTN1, CTN3, DFR1, HEM13, NDE1, POS5, TES15, orf19.2175, orf19.3167, orf19.3515, orf19.6602                                                                                                                                                                                                                                                                                                                                                                                                                                                         |
| thioester metabolic process                    | 6 out of 183 genes, 3.3%   | 23 out of 6517 background genes, 0.4%    | 0.01803           | 0.00%                | ACS1, ACS2, CIT1, CTN1, CTN3, TES15                                                                                                                                                                                                                                                                                                                                                                                                                                                                                                                                  |
| acyl-CoA metabolic process                     | 6 out of 183 genes, 3.3%   | 23 out of 6517 background genes, 0.4%    | 0.01803           | 0.00%                | ACS1, ACS2, CIT1, CTN1, CTN3, TES15                                                                                                                                                                                                                                                                                                                                                                                                                                                                                                                                  |

Terms from the Process Ontology

Supplemental Table 5. Plasmids

|        |                            |
|--------|----------------------------|
| P866   | Mal2p-myc-GFP              |
| P873   | Mal2p-GFP-Hgc1             |
| P1021  | Mal2-myc-Cph2 #15          |
| P1048  | Mal2p-myc-Cph2N plasmid    |
| P1033  | Cph2p-myc-Cph2 plasmid     |
| P1085  | Cph2p-Cph2-myc plasmid     |
| P1028  | Mal2p-GFP-Cph2 plasmid     |
| P1032  | Mal2p-GFP-Cph2-myc plasmid |
| pLC597 | Shapiro et al., 2012 (7)   |

Supplemental Table 6. Primers used in this study

| Primer#                     | Sequence                              | Purpose                                        |
|-----------------------------|---------------------------------------|------------------------------------------------|
| 1                           | CG GGATCC CTTATCGCAGTATGATGAACA       | CPH2p-Cph2-myc subcloning                      |
| 2                           | GCG ACGCGT CG CTGCTTCATCACTCTCATTA    |                                                |
| 9                           | 5'- AGCTGGTGTGCCACCTCCAC              | <i>BRG1</i> qPCR                               |
| 10                          | 5'- TACCACACCTGTGACATCTG              |                                                |
| GFP <sub>MluI</sub> Forward | GCACGCGTATGTCTAAAGGTGAAGAATTATTC      | Mal2p-myc-GFP subcloning                       |
| GFP <sub>KpnI</sub> Reverse | GGGTACCTTATTTGTACAATTCATCCATAACC      |                                                |
| GFP <sub>XbaI</sub> Forward | GCTCTAGAATGTCTAAAGGTGAAGAATTATTC      | Mal2p-GFP-HGC1 subcloning                      |
| 842                         | CGACGCGTTTTGTACAATTCATCCATAACC        |                                                |
| 1086                        | CCATCGATATTTGTTGGGAGGTATGG            | Mal2p-GFP-Cph2-myc subclone                    |
| 925                         | CGGGGTACCTCAGTGATTGATTAATTTTGTTCACCG  |                                                |
| 990                         | TGGAAGCTGCTGGTATTGAC                  | <i>ACT1</i> qPCR                               |
| 991                         | TTCAGCAATACCTGGGAACA                  |                                                |
| 1052                        | CGACGCGTATGTTATCGCAGTATGATGAAC        | Mal2p-myc-Cph2 and<br>Mal2-GFP-Cph2 subcloning |
| 1053                        | GGGTACCTCTTGTCTATACTGTTCCG            |                                                |
| 1102                        | ATAAGAATGCGGCCGCATTGGAGTTTACAGAGGAACG | Cph2p-myc-Cph2 subcloning                      |
| 1103                        | GGACTAGTTAGATGGTTGAATTATAATTTCG       |                                                |
| 1124                        | CCTCCACCTCCTCAACAAAT                  | <i>CPH2</i> qPCR                               |
| 1125                        | GGGTGACATTGAATGATTGG                  |                                                |
| 1128                        | GGGTACCTTATTGAATAGTCAATGGCGATGG       | Mal2p-myc-Cph2N subcloning                     |
| 1475                        | TGGAGGTGTGTGCTATGGTT                  | <i>orf19.4450.1</i> qPCR                       |
| 1476                        | TGCATTGGGTGAACTCTTTC                  |                                                |
| 1479                        | TGCAGACAATGTTGTGTTGG                  | <i>OSM1</i> qPCR                               |
| 1480                        | TTTGTCCGTCACCAGTTGTT                  |                                                |
| 1481                        | GGTCTCTCGTTATGGTGCTG                  | <i>HSP21</i> qPCR                              |
| 1482                        | ACATTGTCATCGAAACCAACA                 |                                                |
| 1501                        | CCACCACAGCTACATCCTCA                  | <i>HMS1</i> qPCR                               |
| 1502                        | TTGGAGCAGAATTGGATGTG                  |                                                |
| 1511                        | ATTGCAAACCTCCAGGGTCTC                 | <i>HEM13</i> qPCR                              |
| 1512                        | GGTTCAGGATGATGGTCGTA                  |                                                |
| 1513                        | TGCTTATTTGGCCACAGTTT                  | <i>ERG251</i> qPCR                             |
| 1514                        | CCCAAAGTGGGAAGAAGCTTG                 |                                                |
| 1515                        | ATGAGTTGCGGAAATGACAA                  | <i>FRP2</i> qPCR                               |
| 1516                        | TTTGGTGCATCTTTAACCCA                  |                                                |
| 1517                        | CGGTAAGACCAAGAACCCAT                  | <i>CIT1</i> qPCR                               |
| 1518                        | AATTGTGGCAAGACACCAAA                  |                                                |
| 1519                        | TCACAATGTGTTTGGCCTTT                  | <i>CDR4</i> qPCR                               |
| 1520                        | CACTGACAACATCACCGACA                  |                                                |
| 1525                        | TACGCATCTGGCTGCTCTT                   | <i>CUP1</i> qPCR                               |
| 1526                        | GAAGCACATTTGCATTGAGTTT                |                                                |
| 1543                        | GGGTATTCTTGCATTGGT                    | <i>PTR2</i> qPCR                               |
| 1544                        | CCTCTGTTGGCTTCCTCTTC                  |                                                |
| 1577                        | TTTTTCAACAAAAGCTGTTGCG                | ARG4 Transformation                            |
| 1578                        | TCAAAGGACTCTCATTAGAGC                 |                                                |

Supplemental Table 7. Strains used in this study

| Strains     | Genotype                                                                                                                                                                                        | Source            |
|-------------|-------------------------------------------------------------------------------------------------------------------------------------------------------------------------------------------------|-------------------|
| SC5314      | Wild Type                                                                                                                                                                                       | (1)               |
| CAI4        | <i>ura3Δ::imm<sup>434</sup>/ura3Δ::imm<sup>434</sup></i>                                                                                                                                        | (2)               |
| BWP17       | <i>ura3Δ::imm<sup>434</sup>/ura3Δ::imm<sup>434</sup>, his1Δ::hisG/his1Δ::hisG, arg4Δ::hisG/arg4Δ::hisG</i>                                                                                      | (3)               |
| HLY3927     | <i>ura3Δ::imm<sup>434</sup>/ura3Δ::imm<sup>434</sup>, his1Δ::hisG/his1Δ::hisG, arg4Δ::hisG/arg4Δ::hisG, ADE2/ade2Δ::CPH2p-myc-CPH2-URA3</i>                                                     | This Study        |
| HLY3829     | <i>ura3Δ::imm<sup>434</sup>/ura3Δ::imm<sup>434</sup>, his1Δ::hisG/his1Δ::hisG, arg4Δ::hisG/arg4Δ::hisG, CPH2/CPH2::CPH2-myc-URA3</i>                                                            | This Study        |
| HLY3918     | <i>ura3Δ::imm<sup>434</sup>/ura3Δ::imm<sup>434</sup>, his1Δ::hisG/his1Δ::hisG, arg4Δ::hisG/arg4Δ::hisG, ADE2/ade2Δ::MAL2p-GFP-CPH2-URA3</i>                                                     | This Study        |
| HLY3919     | <i>ura3Δ::imm<sup>434</sup>/ura3Δ::imm<sup>434</sup>, his1Δ::hisG/his1Δ::hisG, arg4Δ::hisG/arg4Δ::hisG, ADE2/ade2Δ::MAL2p-GFP-CPH2-myc-URA3</i>                                                 | This Study        |
| HLY3966     | <i>ura3Δ::imm<sup>434</sup>/ura3Δ::imm<sup>434</sup>, his1Δ::hisG/his1Δ::hisG, arg4Δ::hisG/arg4Δ::hisG, ADE2/ade2Δ::MALp-myc-CPH2N-URA3</i>                                                     | This Study        |
| HLY3968     | <i>ura3Δ::imm<sup>434</sup>/ura3Δ::imm<sup>434</sup>, his1Δ::hisG/his1Δ::hisG, arg4Δ::hisG/arg4Δ::hisG, ADE2/ade2Δ::MALp-myc-CPH2-URA3</i>                                                      | This Study        |
| HLY1928     | <i>cph2Δ::ARG4/cph2Δ::HIS1, ura3Δ::imm<sup>434</sup>/ura3Δ::imm<sup>434</sup>, his1Δ::hisG/his1Δ::hisG, arg4Δ::hisG/arg4Δ::hisG, ADE2/ade2Δ::URA3</i>                                           | (4)               |
| HLY4149     | <i>cph2Δ::ARG4/cph2Δ::HIS1, ura3Δ::imm<sup>434</sup>/ura3Δ::1 imm<sup>434</sup>, his1Δ::hisG/his1Δ::hisG, arg4Δ::hisG/arg4Δ::hisG, ADE2/ade2Δ::URA3 ACT1/ACT1p-6xHIS-FLAG-HMS1-NAT (pLC597)</i> | This Study<br>(5) |
| <i>hms1</i> | <i>arg4Δ/arg4Δ leu2Δ/leu2Δ his1Δ/his1Δ URA3/ura3Δ::imm<sup>434</sup> IRO1/iro1Δ::imm<sup>434</sup><br/>hms1Δ:: C.dubliniensis HIS1/hms1Δ: C. maltose LEU2</i>                                   | (6)               |
| SN250       | <i>his1Δ/his1Δ, leu2Δ::C.dubliniensis HIS1/ leu2Δ:: C. maltose LEU2, arg4Δ/arg4Δ, URA3/ura3Δ::imm<sup>434</sup> IRO1/iro1Δ::imm<sup>434</sup></i>                                               | (7)               |
| <i>cph2</i> | <i>arg4Δ/arg4Δ leu2Δ/leu2Δ his1Δ/his1Δ URA3/ura3Δ::imm<sup>434</sup> IRO1/iro1Δ::imm<sup>434</sup><br/>cph2Δ:: C.dubliniensis HIS1/cph2Δ: C. maltose LEU2</i>                                   | (7)               |
| HLY4151     | <i>his1Δ/his1Δ, leu2Δ::C.dubliniensis HIS1/ leu2Δ:: C. maltose LEU2, arg4Δ::ARG4/arg4Δ, URA3/ura3Δ::imm<sup>434</sup> IRO1/iro1Δ::imm<sup>434</sup></i>                                         | This Study        |
| HLY4152     | <i>arg4Δ::ARG4/arg4Δ leu2Δ/leu2Δ his1Δ/his1Δ URA3/ura3Δ::imm<sup>434</sup> IRO1/iro1Δ::imm<sup>434</sup><br/>cph2Δ:: C.dubliniensis HIS1/cph2Δ: C. maltose LEU2</i>                             | This Study        |
| HLY4153     | <i>arg4Δ::ARG4/arg4Δ leu2Δ/leu2Δ his1Δ/his1Δ URA3/ura3Δ::imm<sup>434</sup> IRO1/iro1Δ::imm<sup>434</sup><br/>hms1Δ:: C.dubliniensis HIS1/hms1Δ: C. maltose LEU2</i>                             | This Study        |
| <i>upc2</i> | <i>arg4Δ/arg4Δ leu2Δ/leu2Δ his1Δ/his1Δ URA3/ura3Δ::imm<sup>434</sup> IRO1/iro1Δ::imm<sup>434</sup><br/>upc2Δ:: C.dubliniensis HIS1/upc2Δ: C. maltose LEU2</i>                                   | (6)               |
| HLY4007     | <i>arg4Δ/arg4Δ leu2Δ/leu2Δ his1Δ/his1Δ ura3/ura3Δ::imm<sup>434</sup> IRO1/iro1Δ::imm<sup>434</sup><br/>upc2Δ:: C.dubliniensis HIS1/upc2Δ: C. maltose LEU2 cph2Δ::ARG4/cph2Δ::URA3</i>           | This Study        |
| HLY4008     | <i>arg4Δ/arg4Δ leu2Δ/leu2Δ his1Δ/his1Δ ura3/ura3Δ::imm<sup>434</sup> IRO1/iro1Δ::imm<sup>434</sup></i>                                                                                          | This Study        |

|         |                                                                                                                                                                                                                                   |            |
|---------|-----------------------------------------------------------------------------------------------------------------------------------------------------------------------------------------------------------------------------------|------------|
| HLY4113 | <i>upc2Δ:: C.dubliniensis HIS1/upc2Δ: C. maltose LEU2 cph2Δ::ARG4/cph2Δ::URA3<br/>ofd1Δ::ARG4/ofd1Δ::URA3/ofd1::HIS1, ura3Δ::imm<sup>434</sup>/ura3Δ::imm<sup>434</sup>, his1Δ::hisG/his1Δ::hisG,<br/>arg4Δ::hisG/arg4Δ::hisG</i> | (8)        |
| HLY4180 | <i>ubr1::ARG4/ubr1Δ::HIS1, ura3Δ::imm<sup>434</sup>/ura3Δ::imm<sup>434</sup>, his1Δ::hisG/his1Δ::hisG,<br/>arg4Δ::hisG/arg4Δ::hisG, ADE2/ade2Δ::URA3</i>                                                                          | (8)        |
| HLY4208 | <i>ofd1Δ::ARG4/ofd1Δ::URA3/ofd1::HIS1, ura3Δ::imm<sup>434</sup>/ura3Δ::imm<sup>434</sup>, his1Δ::hisG/his1Δ::hisG,<br/>arg4Δ::hisG/arg4Δ::hisG, ADE2/ade2Δ::MALp-myc-CPH2-URA3</i>                                                | This Study |
| HLY4224 | <i>ubr1::ARG4/ubr1Δ::HIS1, ura3Δ::imm<sup>434</sup>/ura3Δ::imm<sup>434</sup>, his1Δ::hisG/his1Δ::hisG,<br/>arg4Δ::hisG/arg4Δ::hisG, ADE2/ade2Δ::MALp-myc-CPH2-URA3</i>                                                            | This Study |
| HLY4226 | <i>ura3Δ::imm<sup>434</sup>/ura3Δ::imm<sup>434</sup>, his1Δ::hisG/his1Δ::hisG, arg4Δ::hisG/arg4Δ::hisG,<br/>ADE2/ade2Δ::MALp-myc-CPH2-URA3 RP10::ACT1p-OFD1<sub>261-617</sub>-13MYC-SAT1</i>                                      | This Study |

## References

1. **Gillum AM, Tsay EY, Kirsch DR.** 1984. Isolation of the *Candida albicans* gene for orotidine-5'-phosphate decarboxylase by complementation of *S. cerevisiae* *ura3* and *E. coli* *pyrF* mutations. *Mol Gen Genet* **198**:179-182.
2. **Fonzi WA, Irwin MY.** 1993. Isogenic strain construction and gene mapping in *Candida albicans*. *Genetics* **134**:717-728.
3. **Wilson D, Thewes S, Zakikhany K, Fradin C, Albrecht A, Almeida R, Brunke S, Grosse K, Martin R, Mayer F, Leonhardt I, Schild L, Seider K, Skibbe M, Slesiona S, Waechtler B, Jacobsen I, Hube B.** 2009. Identifying infection-associated genes of *Candida albicans* in the postgenomic era. *FEMS Yeast Res* **9**:688-700.
4. **Lane S, Zhou S, Pan T, Dai Q, Liu H.** 2001. The basic helix-loop-helix transcription factor Cph2 regulates hyphal development in *Candida albicans* partly via TEC1. *Mol Cell Biol* **21**:6418-6428.
5. **Shapiro RS, Sellam A, Tebbji F, Whiteway M, Nantel A, Cowen LE.** 2012. Pho85, Pcl1, and Hms1 signaling governs *Candida albicans* morphogenesis induced by high temperature or Hsp90 compromise. *Current biology : CB* **22**:461-470.
6. **Homann OR, Dea J, Noble SM, Johnson AD.** 2009. A phenotypic profile of the *Candida albicans* regulatory network. *PLoS Genet* **5**:e1000783.
7. **Noble SM, French S, Kohn LA, Chen V, Johnson AD.** 2010. Systematic screens of a *Candida albicans* homozygous deletion library decouple morphogenetic switching and pathogenicity. *Nat Genet* **42**:590-598.
8. **Lu Y, Su C, Solis NV, Filler SG, Liu H.** 2013. Synergistic Regulation of Hyphal Elongation by Hypoxia, CO<sub>2</sub>, and Nutrient Conditions Controls the Virulence of *Candida albicans*. *Cell host & microbe* **14**:499-509.
